# Supplementary material for: Single-unit-cell thick Mn3O4 nanosheets
Source: Royal Society of Chemistry journal article supplement (doi:10.1039/c1cc15418d), 2011-01-01
Supplement: c1cc15418d.pdf [file c1cc15418d.pdf]

## Electronic Supplementary Information

### Single-Unit-Cell Thick $\text{Mn}_3\text{O}_4$ Sheets

Hongwen Huang, Qing Yu, Xinsheng Peng,\* Zhizhen Ye

State Key Laboratory of Silicon Materials, Department of Materials Science and Engineering,  
Zhejiang University

#### 1 Experimental Section

*Synthesis of single-unit-cell thick  $\text{Mn}_3\text{O}_4$  nanosheets,  $\text{Mn}(\text{OOH})$  nanofibers and  $\text{Mn}_3\text{O}_4$  nanoparticles:*

$\text{Mn}_3\text{O}_4$  nanosheets were typically synthesized as: after purging 10 ml 0.4 mM  $\text{Mn}(\text{NO}_3)_2$  solution and 10 ml 0.8 mM aminoethanol (AE) solution by pure argon for 30 mins, respectively, then AE solution was injected into the  $\text{Mn}(\text{NO}_3)_2$  solution under stirring. The argon stream was kept for 3 hours. After reaction for one day, the grey-brown suspensions were collected by filtered on a polycarbonate membrane with 200 nm pores. Simply replace the argon with pure oxygen,  $\text{MnOOH}$  nanofibers were obtained. Similar to the synthesis process of  $\text{Mn}_3\text{O}_4$  nanosheet,  $\text{Mn}_3\text{O}_4$  nanoparticles were prepared by using KOH as the basic source and keep the other conditions the same.

*Characterization:* The morphologies and structures of the films were characterized by using a SEM (*Hitachi S-4800*). SEM observation was conducted after coating a 2 nm thick platinum layer by using a *Hitachi e-1030* ion sputter at the pressure of 10 Pa and the current density of 10 mA. The TEM and HRTEM images were recorded by JEOL 2100F. X-ray diffraction patterns were performed by X'Pert PRO (PANalytical, Netherlands). XPS spectra were measured by ESCALAB 250 X-ray photoelectron spectroscopy. Raman spectroscopy was recorded by Labor Raman HR-800 equipment (Jobin Yvon, France). Laser excitation is 514.5 nm. The power is 10 mW with integration time of 10 seconds. The magnetic of the as-synthesized  $\text{Mn}_3\text{O}_4$  nanosheets were investigated by a SQUID magnetometer (Quantum Design).

## 2 AFM characterization of the as-synthesized sheets

For AFM measurement, after sonicating the collected nanosheets in ethanol for 10 mins, a small drop of the dispersion was spin-coated on a highly ordered pyrolytic graphite (HOPG) surface. The measurements were carried out using tapping mode (Veeco Multimode) . Figure S1 shows the AFM image and the thickness along the marked line in the image. It is clear that the thickness of the nanosheet is about 1.05 nm.

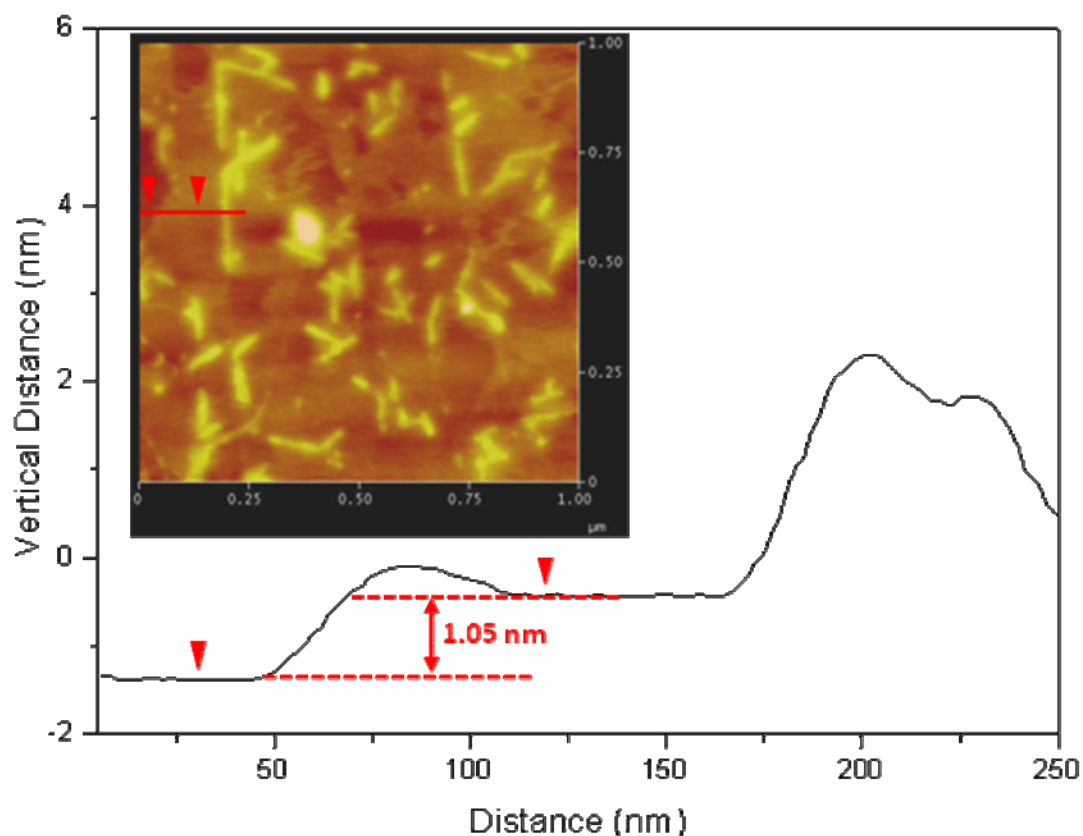

**Figure S1** AFM image and thickness plot of the as-synthesized nanosheets.

## 2 Formation and characterization $\beta$ -MnOOH nanofibers synthesized by purging oxygen

For comparison, the oxygen purging process was utilized in place of argon, while all the process remained the same (10 ml, 0.4 mM  $\text{Mn}(\text{NO}_3)_2$  and 10 ml, 0.8 mM AE). It was found that nanofibrous structures were formed as shown in Figure S2, after 12 hours, when purging oxygen through the reaction solution with a 100 sccm flow rate. The corresponding XRD indicates that these nanofibers are in the phase of  $\beta$ -MnOOH,<sup>1</sup> and the same as  $\beta$ -MnOOH nanofibers that were synthesized at room temperature in air (ref. 11 in the main text). This means that the oxygen amount plays a key role in the formation of

Mn<sub>3</sub>O<sub>4</sub>. At higher oxygen concentrations, with the continuous purging of oxygen, the Mn<sup>2+</sup> ions were completely oxidized to Mn<sup>3+</sup> and formed β-MnOOH nanofibers. It is not energy available to transition to much higher valent manganese ions.<sup>1</sup> At low oxygen concentration, the Mn<sup>2+</sup> was partially oxidized to Mn<sup>3+</sup> and formed Mn<sub>3</sub>O<sub>4</sub> by reconstructed the remaining Mn<sup>2+</sup>.

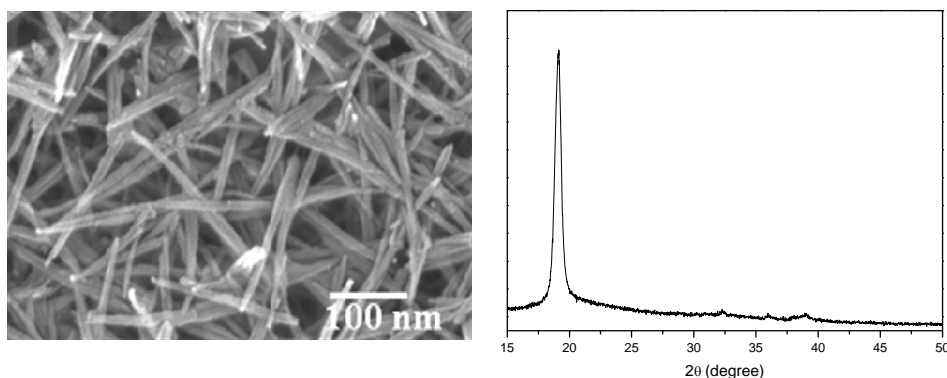

**Figure S2** SEM image and XRD of the sample prepared by purging oxygen.

### 3 Formation Mn<sub>3</sub>O<sub>4</sub> nanoparticles by using KOH replace aminoethanol

Figure S3 shows a SEM image of the sample prepared via the mixture of 10 ml 0.4 mM Mn(NO<sub>3</sub>)<sub>2</sub> solution and 10 ml 0.8 KOH solution. Before mixing, the solutions were purged by pure argon for 30 mins, respectively. Then the KOH solution was injected into the Mn(NO<sub>3</sub>)<sub>2</sub> solution under stirring. The argon stream was maintained for three hours. The reaction was elongated for 24 hrs. It is clearly seen that nanoparticles with diameter of 40-60 nm were formed and absent of sheet structures. The XRD results demonstrated that the phase of the nanoparticle is distorted spinel Mn<sub>3</sub>O<sub>4</sub> (JCPDF 24-0734).

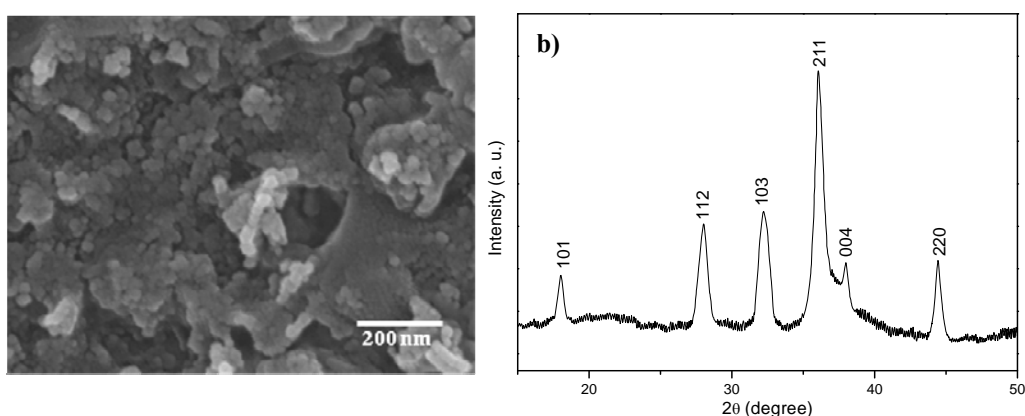

**Figure S3** (a) SEM image and (b) XRD pattern of Mn<sub>3</sub>O<sub>4</sub> nanoparticles prepared from 0.4 mM Mn(NO<sub>3</sub>)<sub>2</sub> and 0.8 mM KOH.

#### 4 Schematic diagram of the formation mechanism of the manganese oxide or hydroxide nanostructures at room temperature

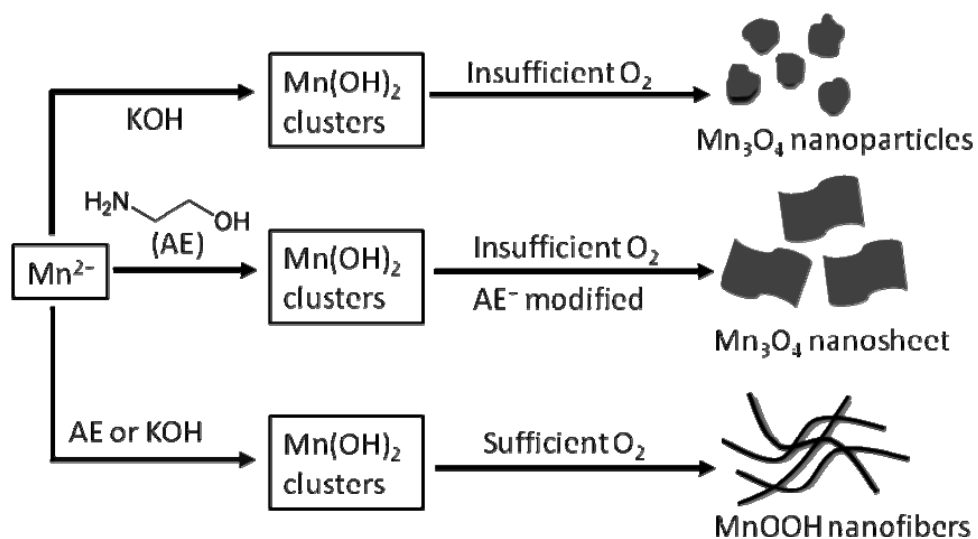

**Scheme S1** Illustration of the formation processes of different manganese oxide or hydroxide phases.

#### 5 Raman and X-ray photoelectron spectroscopy spectra

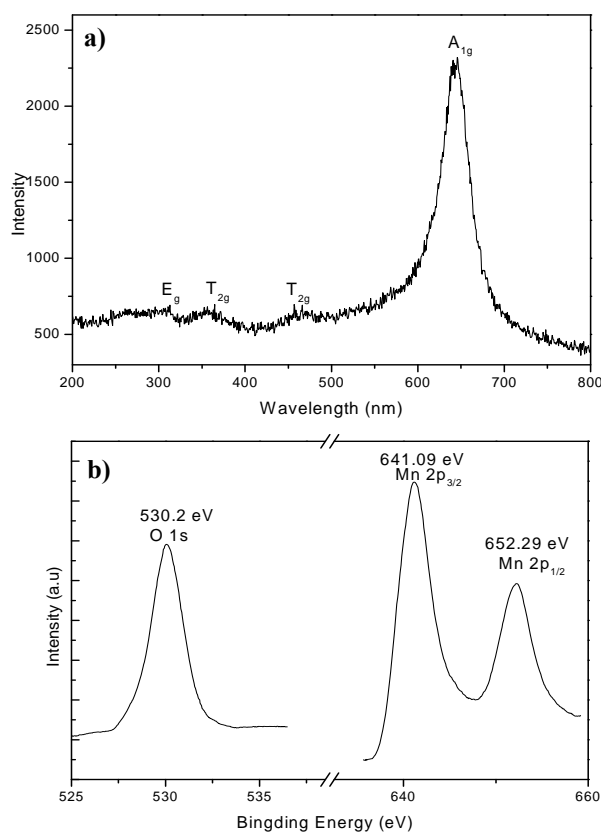

**Figure S4** (a) Raman and (b) XPS spectra recorded from the as-synthesized sheets.

Reference:

1. K. W. Mandernack, J. Post, B. M. Tebo, *Geochim. Cosmochim. Acta* 1995, 59, 4393.
